# Supplementary material
Source: PubMed Central journal article supplement (PMC3084334)
Supplement: NIHMS254451-supplement-table.pdf [file NIHMS254451-supplement-table.pdf]

| <b>Gene Name</b>   | <b>MGC Clone Accession</b> | <b>Confirmed by <i>in Vitro</i> assays</b> | <b>Confirmed by Mammalian Two Hybrid</b> |
|--------------------|----------------------------|--------------------------------------------|------------------------------------------|
| ASF1A              | BC010878                   | LBD, E2-dependent                          | E2-Dependent                             |
| ATF1               | BC029619                   | LBD, E2-dependent                          | No Interaction                           |
| BLCAP              | BC030705                   | A-C domains                                | E2-Dependent                             |
| DNM1L (DRP1, DLP1) | BC024590                   | LBD, E2-dependent                          | E2-Independent                           |
| EDF1 (MBF1)        | BC015500                   | No Interaction                             | No Interaction                           |
| HAX1               | BC016730                   | LBD, E2-dependent                          | E2-Dependent                             |
| MYL6               | BC071661                   | LBD, E2-independent                        | No Interaction                           |
| NDRG2              | BC010458                   | n/a                                        | E2-Dependent                             |
| RAC3               | BC009605                   | LBD, E2-independent                        | E2-Dependent                             |
| SENP5              | BC030705                   | n/a                                        | E2-Independent                           |
