# Supplementary material
Source: PubMed Central journal article supplement (PMC3084334)

A

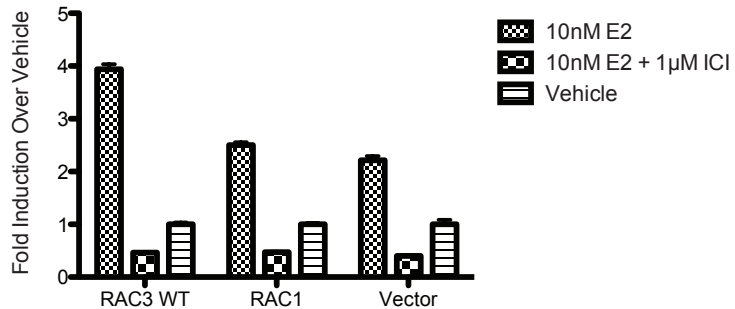

B

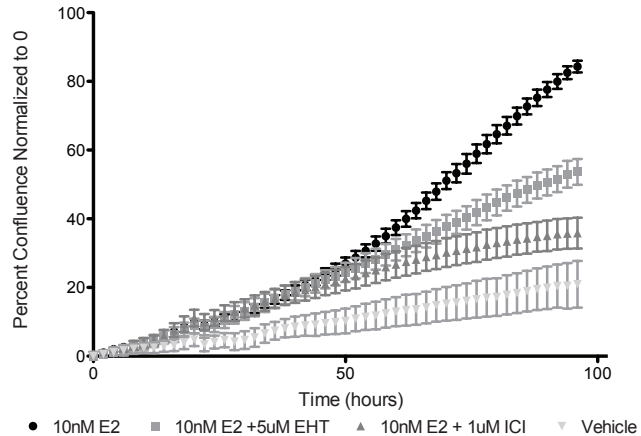

Supplement: NIHMS254451-supplement-Fig1.pdf [file NIHMS254451-supplement-Fig1.pdf]

A

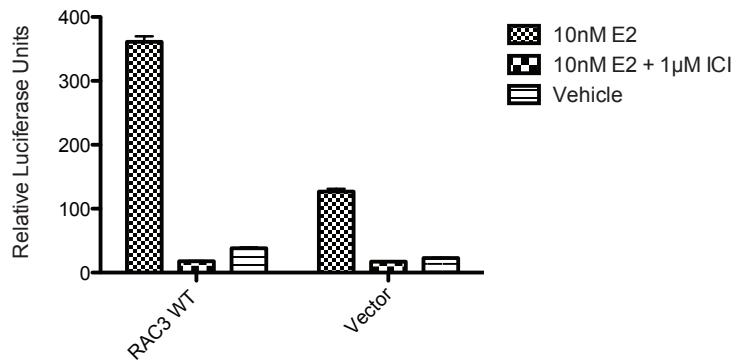

B

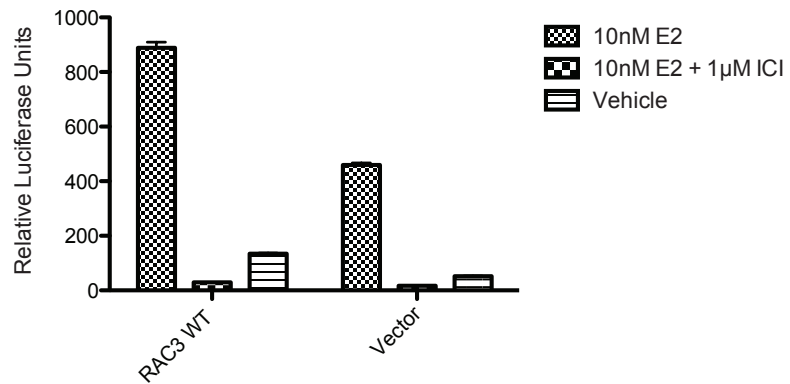

C

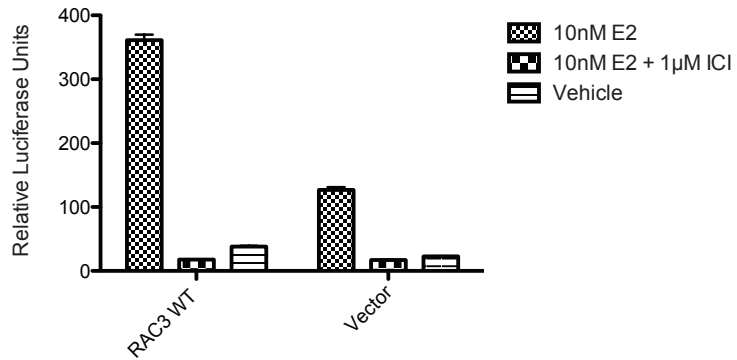

Supplement: NIHMS254451-supplement-Fig2.pdf [file NIHMS254451-supplement-Fig2.pdf]

**A**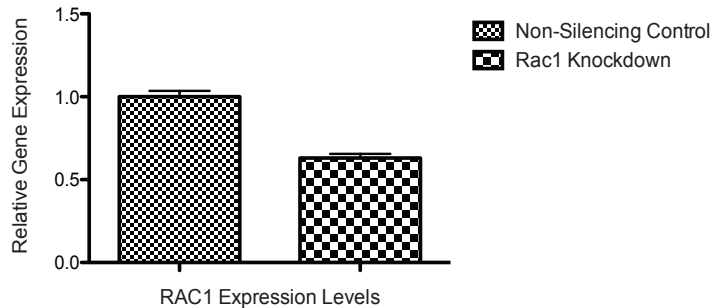**B**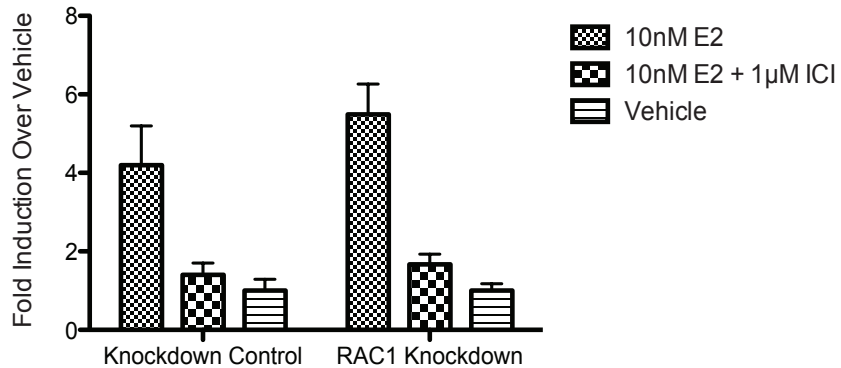

Supplement: NIHMS254451-supplement-Fig3.pdf [file NIHMS254451-supplement-Fig3.pdf]
